# Supplementary material
Source: MDPI journal article supplement (https://www.mdpi.com/2073-4441/11/3/621)
Supplement: s1 [file s1]

Article

# Supplementary Material: Comparative Study of Four TiO<sub>2</sub> Based Photocatalysts to Degrade 2,4-D in a Semi-Passive System

Gisoo Heydari <sup>1,\*</sup>, Jordan Hollman <sup>1</sup>, Gopal Achari <sup>1</sup> and Cooper H. Langford <sup>2</sup>

<sup>1</sup> Department of Civil Engineering, University of Calgary, 2500 University Dr. NW, Calgary, AB T2N 1N4, Canada; jordan.hollman@ucalgary.ca (J.H.); gachari@ucalgary.ca (G.A.)

<sup>2</sup> Department of Chemistry, University of Calgary, 2500 University Dr. NW, Calgary, AB T2N 1N4, Canada; chlangfo@ucalgary.ca

\* Correspondence: gisoo.heydari@ucalgary.ca

Received: 14 February 2019; Accepted: 21 March 2019; Published: 36 March 2019

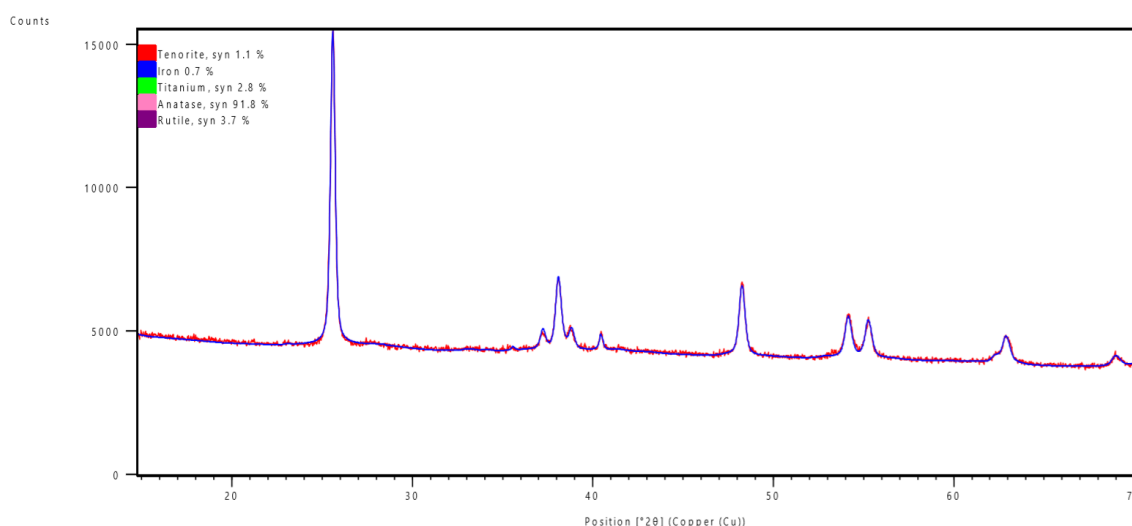

Figure S1. XRD of titanium dioxide mesh.

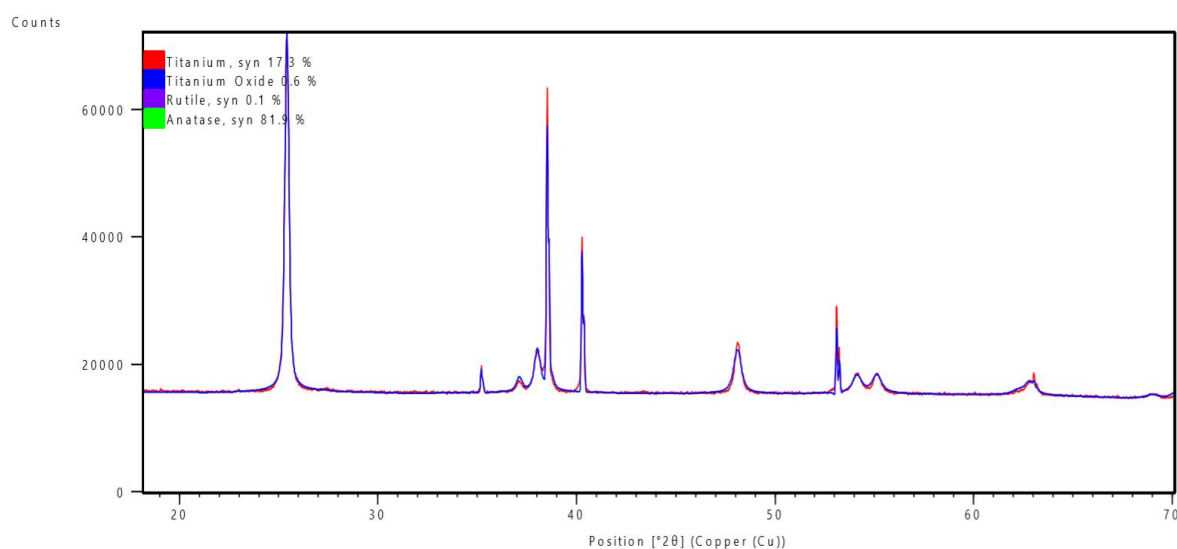

Figure S2. XRD of titanium dioxide plate.

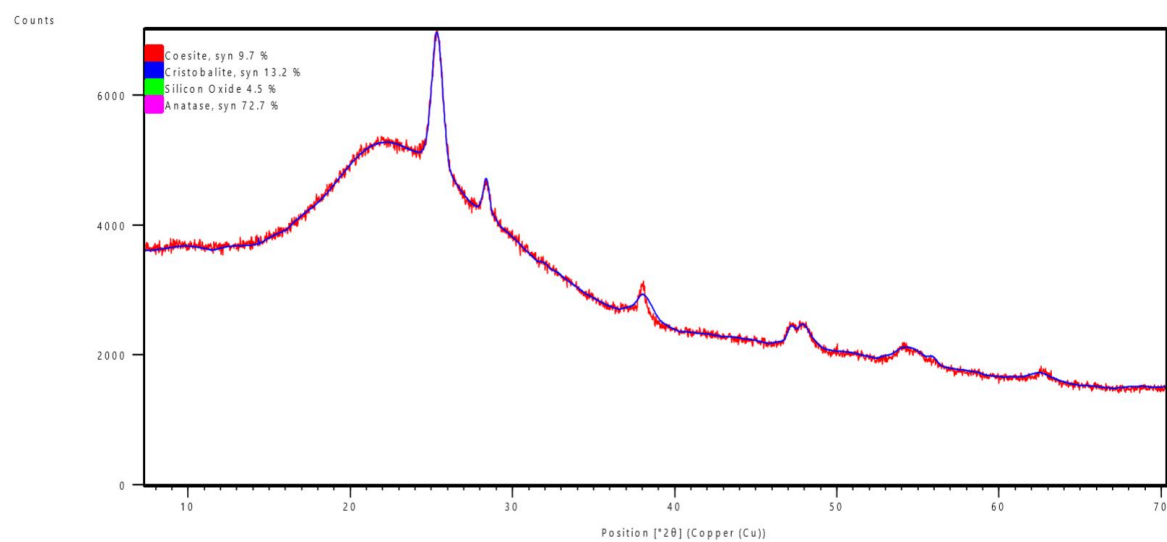

**Figure S3.** XRD of titanium dioxide photospheres.
